# Supplementary material for: The influence of carbon nanotubes and graphene oxide sheets on the morphology, porosity, surface characteristics and thermal and electrical properties of polysiloxane derived ceramics
Source: Royal Society of Chemistry journal article supplement (doi:10.1039/c7ra01937h), 2017-01-01
Supplement: c7ra01937h1.pdf [file c7ra01937h1.pdf]

## Supporting Information

### **The Influence of Carbon Nanotubes and Graphene Oxide Sheets on the Morphology, Porosity, Surface Characteristics and Thermal and Electrical Properties of Polysiloxane Derived Ceramics**

Prabu Moni<sup>a</sup>, Michaela Wilhelm<sup>a\*</sup> and Kurosch Rezwani<sup>a, b</sup>

<sup>a</sup> Advanced Ceramics, University of Bremen, Am Biologischen Garten 2, 28359 Bremen,  
Germany

<sup>b</sup> MAPEX Center for Materials and Processes, University of Bremen, Germany

\* Corresponding author. Tel.: +49 421 218 64944; fax: +49 421 218 64932.

E-mail address: [mwilhelm@uni-bremen.de](mailto:mwilhelm@uni-bremen.de)

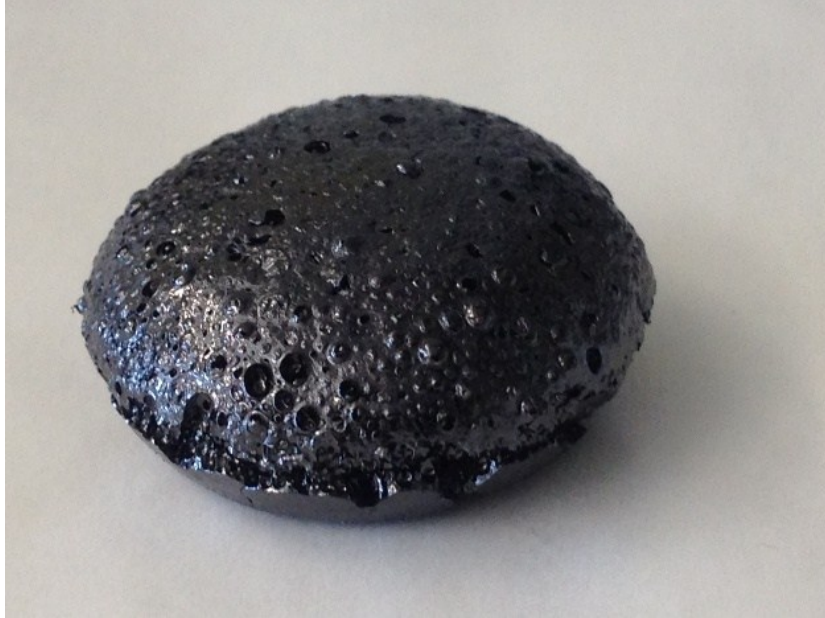

*Figure S1. Monolithic structure of filler incorporated ceramic sample pyrolyzed at 1000 °C*

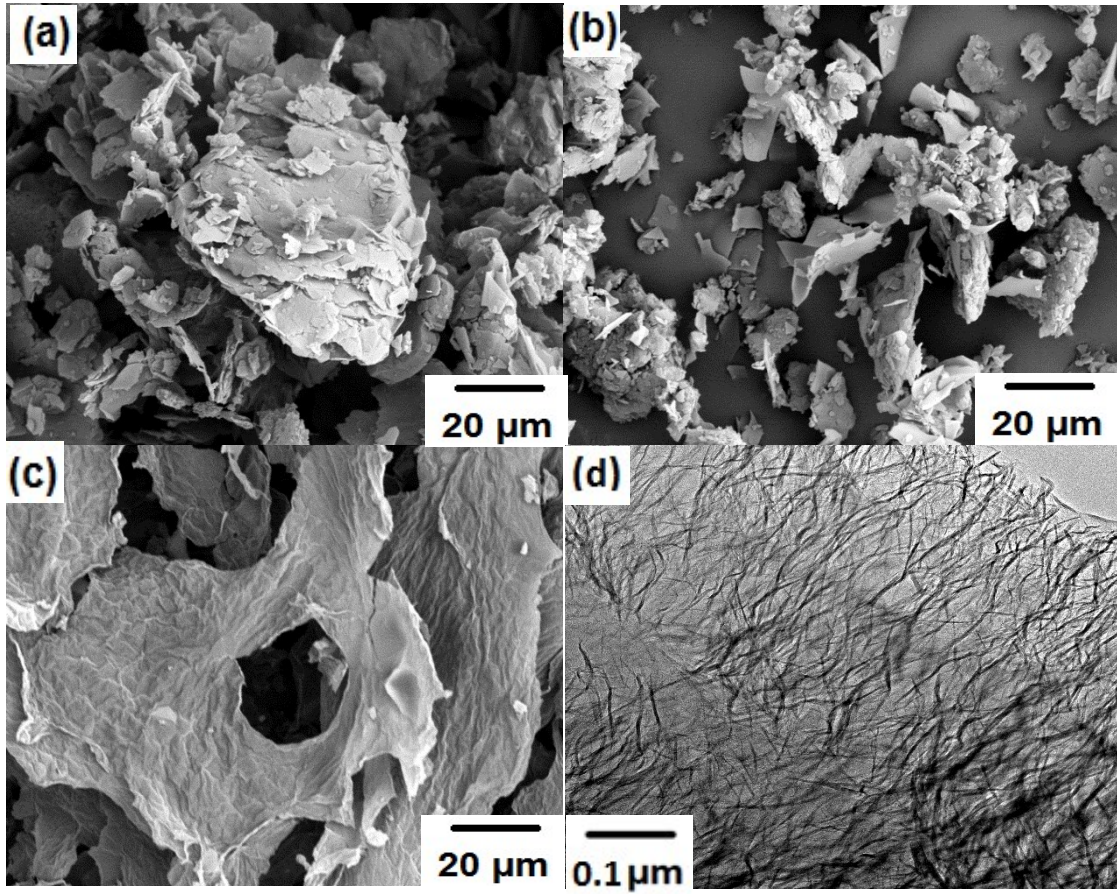

Figure S2. SEM images of (a) Graphite from Sigma-Aldrich; (b) Graphene oxide prepared from modified Hummer method; (c) Thermally treated Reduced Graphene oxide by pyrolyzed at 1000 °C for 4h; and (d) TEM image of Reduced Graphene oxide

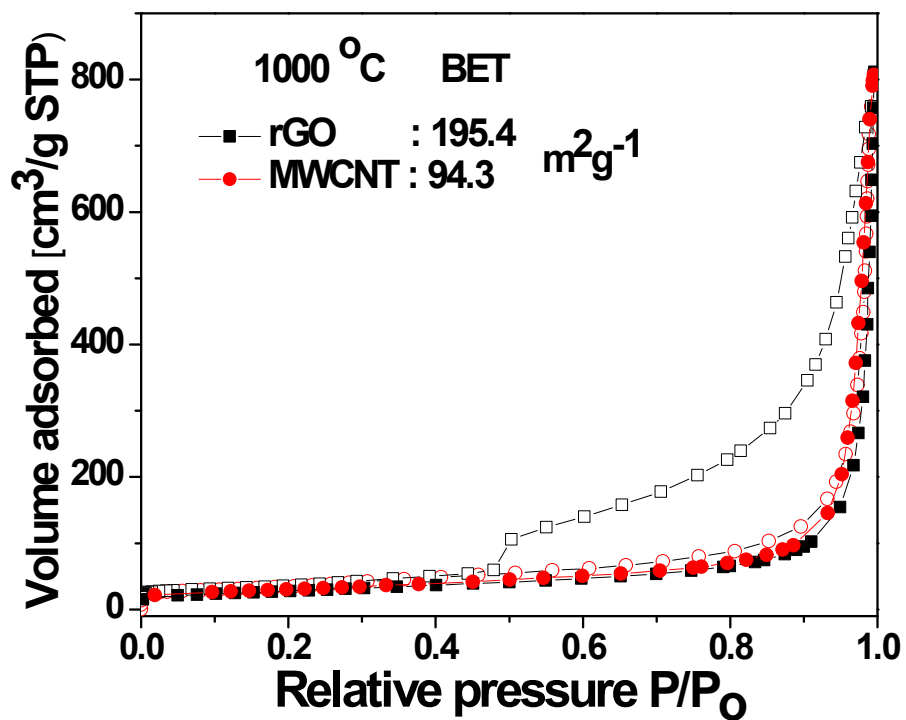

Figure S3.  $N_2$  adsorption–desorption isotherms of thermally treated conductive fillers (rGO and MWCNT) pyrolyzed at 1000 °C for 4h with corresponding specific BET surface areas

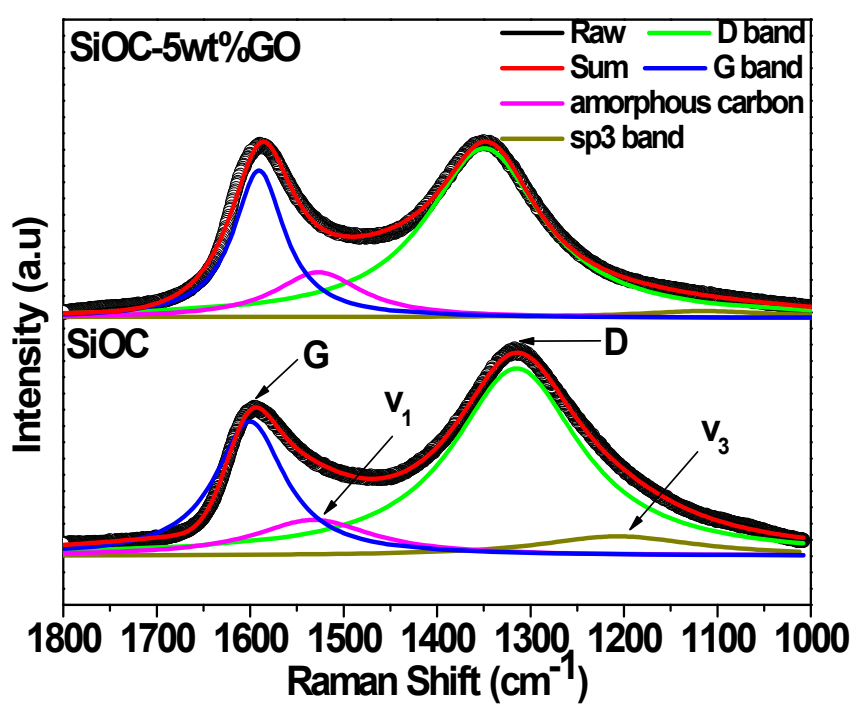

*Figure S4: Raman spectra of pure and 5wt% GO-incorporated SiOC ceramics*

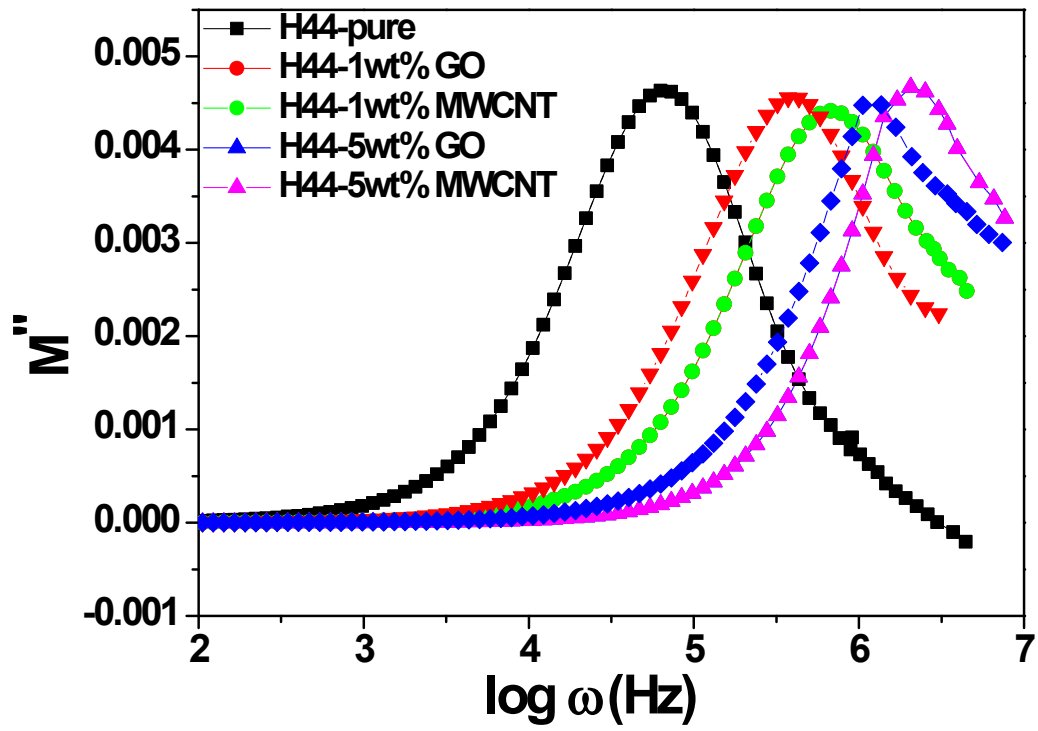

Figure S5: Modulus spectrum of nanofillers (GO and MWCNT) incorporated SiOC ceramics at room temperature

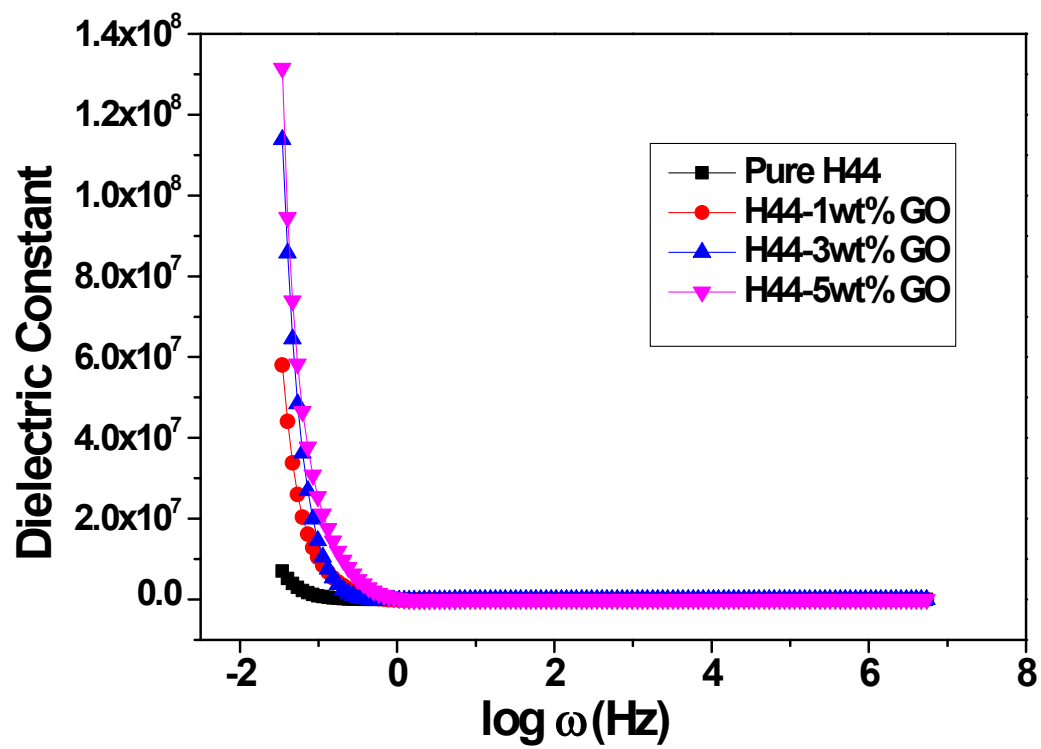

Figure S6: Dielectric spectra of GO incorporated SiOC ceramics at room temperature



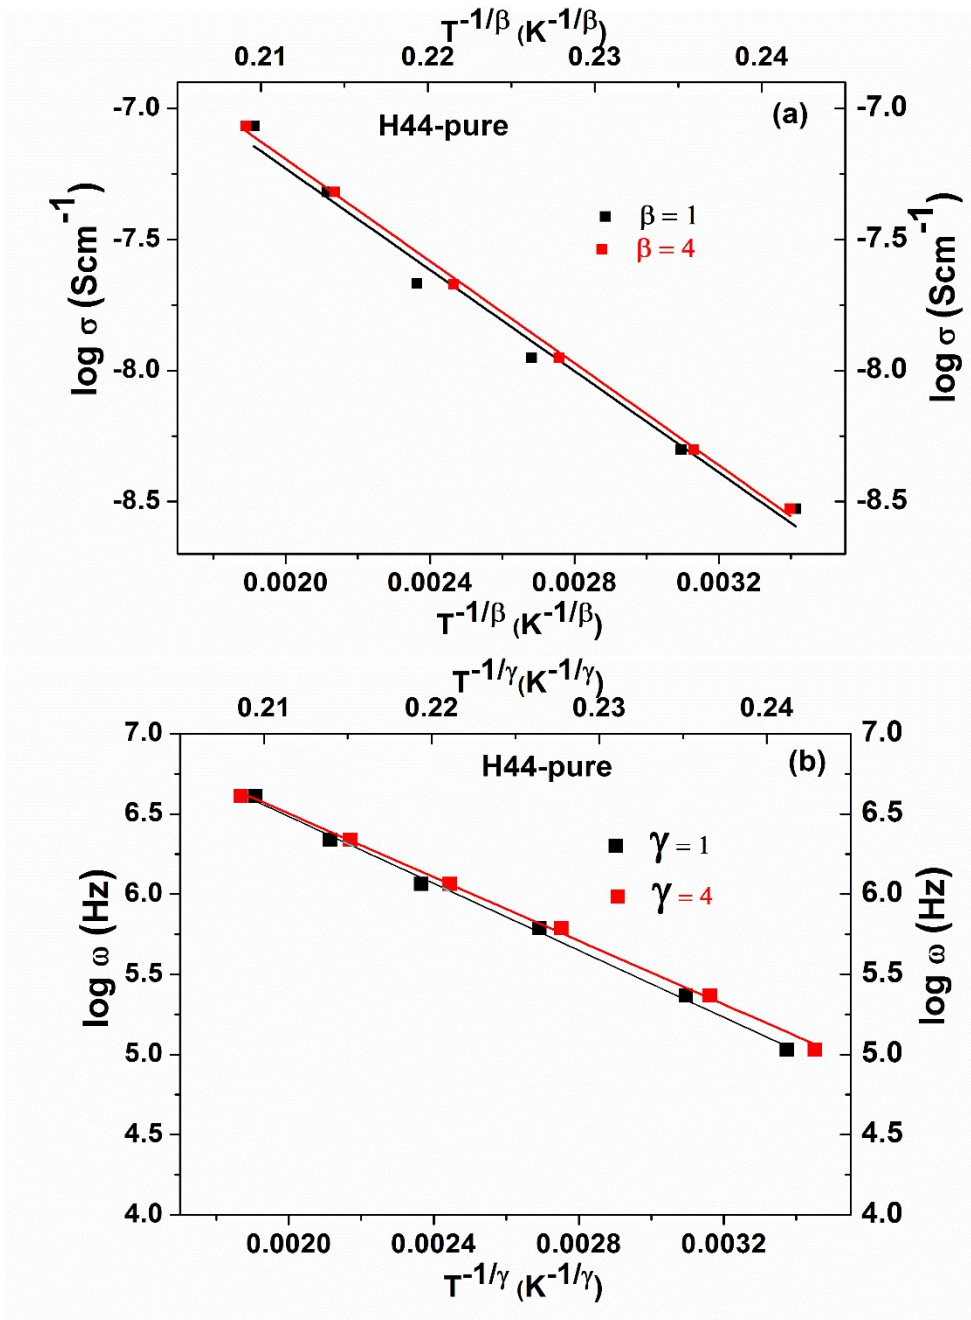

Figure

S7: (a)

Low

*frequency conductivity variation and (b) characteristic frequency variation pure SiOC ceramics at various measuring temperature*

Table S1. Specific BET surface areas and density of graphite, graphene oxide, and reduced graphene oxide

|                                                 | Graphite | Graphene Oxide | Reduced Graphene Oxide |
|-------------------------------------------------|----------|----------------|------------------------|
| BET Surface Area ( $\text{m}^2 \text{g}^{-1}$ ) | 4.8      | 54             | 195                    |
| Density ( $\text{g/cm}^3$ )                     | 2.180    | 1.883          | 1.671                  |
